# Supplementary material
Source: PubMed Central journal article supplement (PMC11029245)
Supplement: 262_2016_1846_MOESM1_ESM.pdf [file 262_2016_1846_MOESM1_ESM.pdf]

**Supplementary Table S1** Pre-treatment anti-Gal titers,  $\alpha$ -gal glycolipids dose and volume

| Patient ID | Pre-treatment anti-Gal titers | Dose level (mg) | Treatment volume $\alpha$ -gal glycolipids (ml) |
|------------|-------------------------------|-----------------|-------------------------------------------------|
| UW001      | 1:400                         | 0.1             | 1.0                                             |
| UW002      | 1:200                         | 0.1             | 1.0                                             |
| UW003      | 1:200                         | 0.1             | 1.0                                             |
| UW004      | 1:80                          | 1.0             | 1.0                                             |
| UW005      | 1:320                         | 1.0             | 1.0                                             |
| UW006      | 1:80                          | 1.0             | 1.0, 0.5 <sup>a</sup>                           |
| UW007      | 1:640                         | 10.0            | 1.0                                             |
| UW008      | 1:80                          | 10.0            | 1.0                                             |
| UW009      | 1:160                         | 10.0            | 1.0                                             |

<sup>a</sup> Volume of first and second dose was 1 ml and 0.5 ml, respectively. Per protocol, concentrated doses were used for subjects whose target lesion could not accommodate a full 1 ml dose volume.

**Supplementary Table S1** Pre-treatment anti-Gal titers,  $\alpha$ -gal glycolipids dose and volume. Data are presented for the pre-treatment sera anti-Gal titers, and the dose and volume of  $\alpha$ -gal glycolipids delivered to each patient.

**Supplementary Table S2a** Tumor biopsy PD-L1 expression: Inflammatory cells<sup>a</sup>

| Patient ID | Pre-treatment |            | 2 wk. post 1 <sup>st</sup> injection |            | 4 wk. post 2 <sup>nd</sup> injection |            |
|------------|---------------|------------|--------------------------------------|------------|--------------------------------------|------------|
|            | Target        | Non-target | Target                               | Non-target | Target                               | Non-target |
| UW001      | N/A           | N/A        | Neg                                  | ND         | ++                                   | ND         |
| UW002      | +             | ND         | +                                    | ND         | ++                                   | ND         |
| UW003      | +             | +          | +++                                  | ND         | +++                                  | ++         |
| UW004      | +             | +          | +                                    | ND         | +                                    | ++         |
| UW005      | Neg           | ND         | +                                    | ND         | Neg                                  | +          |
| UW006      | Neg           | Neg        | Neg                                  | ND         | ++                                   | ND         |
| UW007      | Neg           | ND         | +                                    | ND         | Neg                                  | ND         |
| UW008      | ++            | ND         | ++                                   | ND         | ++                                   | ND         |
| UW009      | +++           | ND         | +++                                  | ND         | +++                                  | ND         |

<sup>a</sup> Exploratory analyses, no formal statistical analysis.

Abbreviations: N/A, Inadequate tissue for staining; ND, biopsy not done; Neg, Negative; +, Rare and dim staining; ++, Moderate staining of most cells; +++, Strong staining of most cells

**Supplementary Table S2a** Tumor biopsy PD-L1 expression: Inflammatory cells. Data is presented for the level of PD-L1 staining on dendritic-like and macrophage-like cells from biopsies collected at pre-treatment, 2 weeks after the 1<sup>st</sup> injection, and 4 weeks after the 2<sup>nd</sup> injection for both injected (target) lesion and non-injected (non-target) lesion.

**Supplementary Table S2b** Tumor biopsy PD-L1 expression: Melanoma cells<sup>a</sup>

| Patient ID | Pre-treatment |            | 2 wk. post 1 <sup>st</sup> injection |            | 4 wk. post 2 <sup>nd</sup> injection |            |
|------------|---------------|------------|--------------------------------------|------------|--------------------------------------|------------|
|            | Target        | Non-target | Target                               | Non-target | Target                               | Non-target |
| UW001      | N/A           | N/A        | +                                    | ND         | Neg                                  | Neg        |
| UW002      | Neg           | ND         | Neg                                  | ND         | Neg                                  | ND         |
| UW003      | Neg           | +          | +                                    | ND         | +                                    | +++        |
| UW004      | Neg           | Neg        | Neg                                  | ND         | Neg                                  | Neg        |
| UW005      | Neg           | ND         | +                                    | ND         | Neg                                  | Neg        |
| UW006      | ++            | ++         | ++                                   | ND         | ++                                   | ND         |
| UW007      | Neg           | ND         | Neg                                  | ND         | Neg                                  | ND         |
| UW008      | Neg           | ND         | Neg                                  | ND         | Neg                                  | ND         |
| UW009      | +             | ND         | ++                                   | ND         | ++                                   | ND         |

<sup>a</sup> Exploratory analyses, no formal statistical analysis.

Abbreviations: N/A, Inadequate tissue for staining; ND, biopsy not done; Neg, Negative; +, Rare and dim staining; ++, Moderate staining of most cells; +++, Strong staining of most cells

**Supplementary Table S2b** Tumor biopsy PD-L1 expression: Melanoma cells. Data are presented for the level of PD-L1 staining on melanoma cells from biopsies collected at pre-treatment, 2 weeks after the 1<sup>st</sup> injection, and 4 weeks after the 2<sup>nd</sup> injection for both injected (target) lesion and non-injected (non-target) lesion.

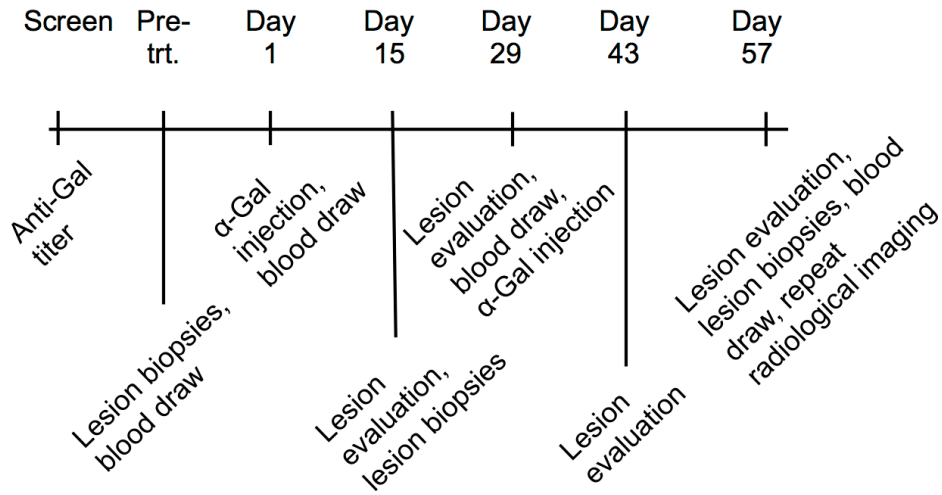

**Supplementary Fig. S1** Schematic of  $\alpha$ -gal glycolipids treatment, blood and biopsy collection, and tumor evaluation time points. Time points are relative to initiation of treatment.

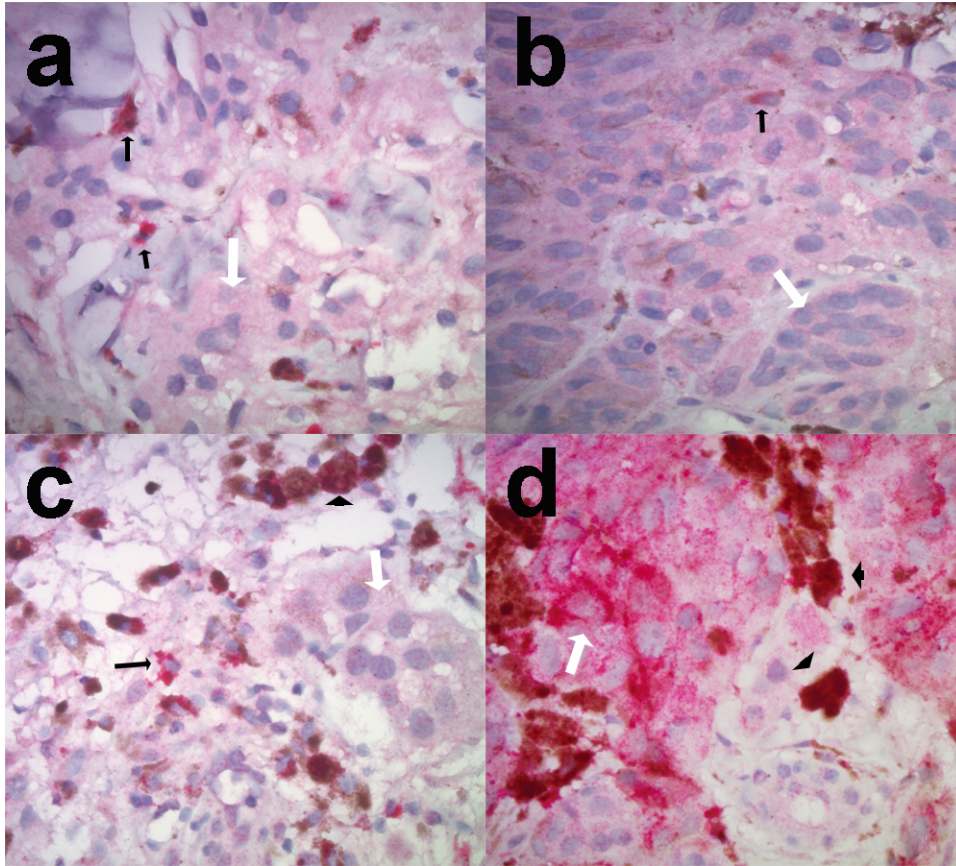

**Supplementary Fig. S2** PD-L1 expression in tumor biopsies before and after  $\alpha$ -gal glycolipids treatment. Melanoma biopsies from an injected (target) lesion (**a** and **c**) and non-injected (non-target) lesion (**b** and **d**) were stained for PD-L1 expression (red) prior to therapy (**a** and **b**) and four weeks following the 2<sup>nd</sup> injection (**c** and **d**). Initially, scattered macrophage-like cells (black arrows) show PD-L1 expression with the tumor cells showing negative or very light staining which was not substantially above background (white arrows). Following therapy in this patient, increased numbers of macrophages (and melanophages, black arrowheads) showed PD-L1 staining and in this patient, tumor cells also showed increased expression as compared to the negative staining of the small vessel at the lower right of panel **d**. Magnification shown is 40x on the images (400x total).
